# Supplementary material for: A novel electrochemical sensor of tryptophan based on silver nanoparticles/metal–organic framework composite modified glassy carbon electrode
Source: Royal Society of Chemistry journal article supplement (doi:10.1039/c5ra25251b), 2016-01-01
Supplement: c5ra25251b1.pdf [file c5ra25251b1.pdf]

## Supporting Information

*For*

A novel electrochemical sensor of tryptophan based on silver nanoparticles/metal-organic framework composite modified glassy carbon electrode

Zhewei Peng<sup>a</sup>, Zhongwei Jiang<sup>a</sup>, Xin Huang<sup>a</sup> and Yuanfang Li<sup>a\*</sup>

<sup>a</sup> Key Laboratory of Luminescent and Real-Time Analytical Chemistry (Southwest University), Ministry of Education, College of Chemistry and Chemical Engineering, Southwest University, Chongqing 400715, China. E-mail: liyf@swu.edu.cn, Tel: (+86) 23 68254659, Fax: (+86) 23 68367257.

### Additional figures

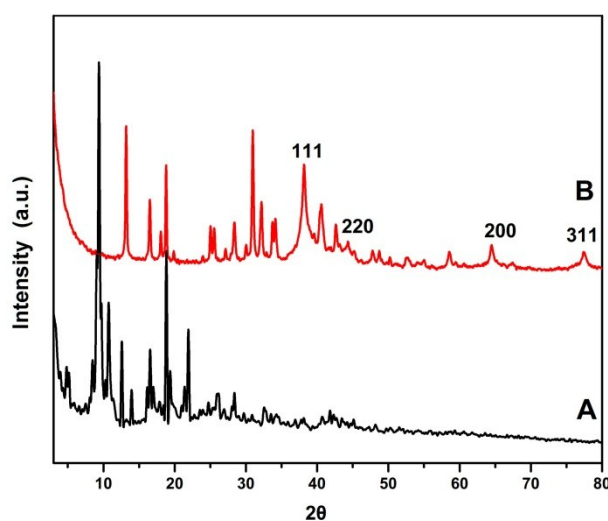

**Figure. S1** The X-ray diffraction patterns of MIL-101 (A) and AgNPs/MIL-101 (B).

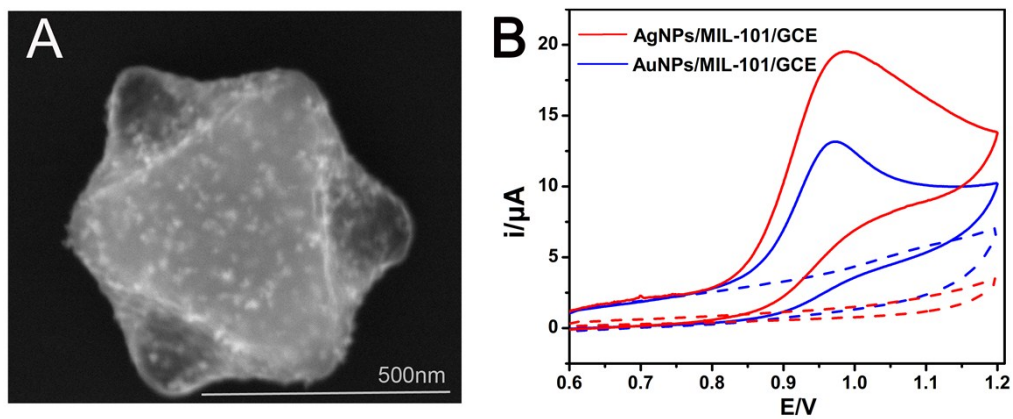

**Fig. S2** (A) SEM image of AuNPs/MIL-101. (B) CVs of different electrodes in the absence (dotted line) and presence (solid line) of 0.1 mM Trp in BR buffer solution (pH 2.4) with scan rate of 100 mV/s.

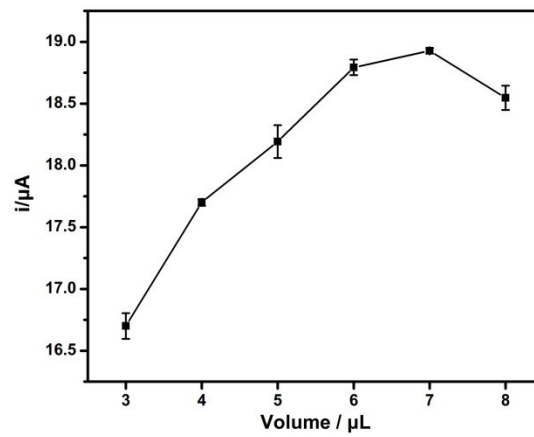

**Figure. S3** The relationship between the amount of 2mg/ml AgNPs/MIL-101 and the peak current of 100 $\mu\text{M}$  Trp in BR (pH 2.4).

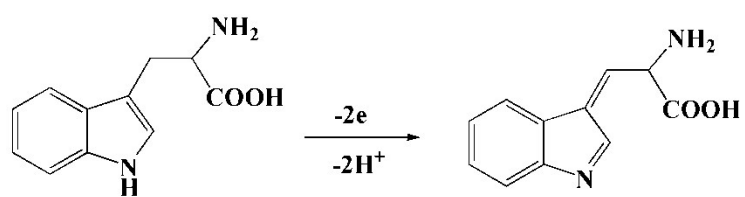

**Figure. S4** Scheme of the electrochemical reaction process for Trp on AgNPs/MIL-101/GCE

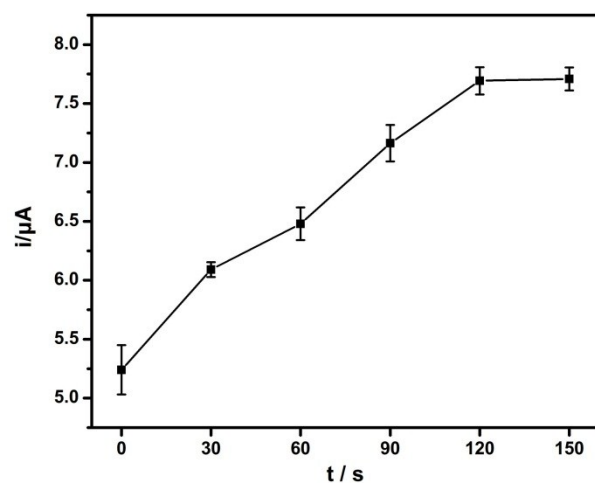

**Figure. S5** The effect of accumulation time on the current response of 0.1mM Trp in BR (pH 2.4).
